# Supplementary material for: The role of ADAMTS2 in schizophrenia: Validation in a novel transgenic mouse model
Source: Research Square preprint supplement (doi:10.21203/rs.3.rs-8345763/v1), 2026-02-12
Supplement: Supplementary file 1 [file 7738a3f163f998976f729610.docx]

**The role of ADAMTS2 in schizophrenia: Validation in a novel transgenic mouse model**

**Celia Martín-Cuevas a,b , Álvaro Flores-Martínez a , Víctor Darío Ramos-Herrero a , Amanda Moreno-Mellado a , Benedicto Crespo-Facorro a,b,c 2 *, Ana C. Sánchez-Hidalgo a,b 2**

**Supplementary material**

**Table S1. Oligonucleotide Sequences Used for Transgenic Mouse Line Genotyping**

| **Primer** | **Hibridation temperature** | **Sequence** |
| --- | --- | --- |
| **Rosa26 Fw** | 60 °C | 5’-AAAGTCGCTCTGAGTTGTTAT-3’ |
| **Rosa26 Rv 1** | 60 °C | 5’-GGAGCGGGAGAAATGGATATG-3’ |
| **Rosa26 Rv 2** | 60 °C | 5’-GCGAAGAGTTGGTCCTCAACC-3’ |

**Behavioral Assays**

**Execution order of behavioral tests**

**
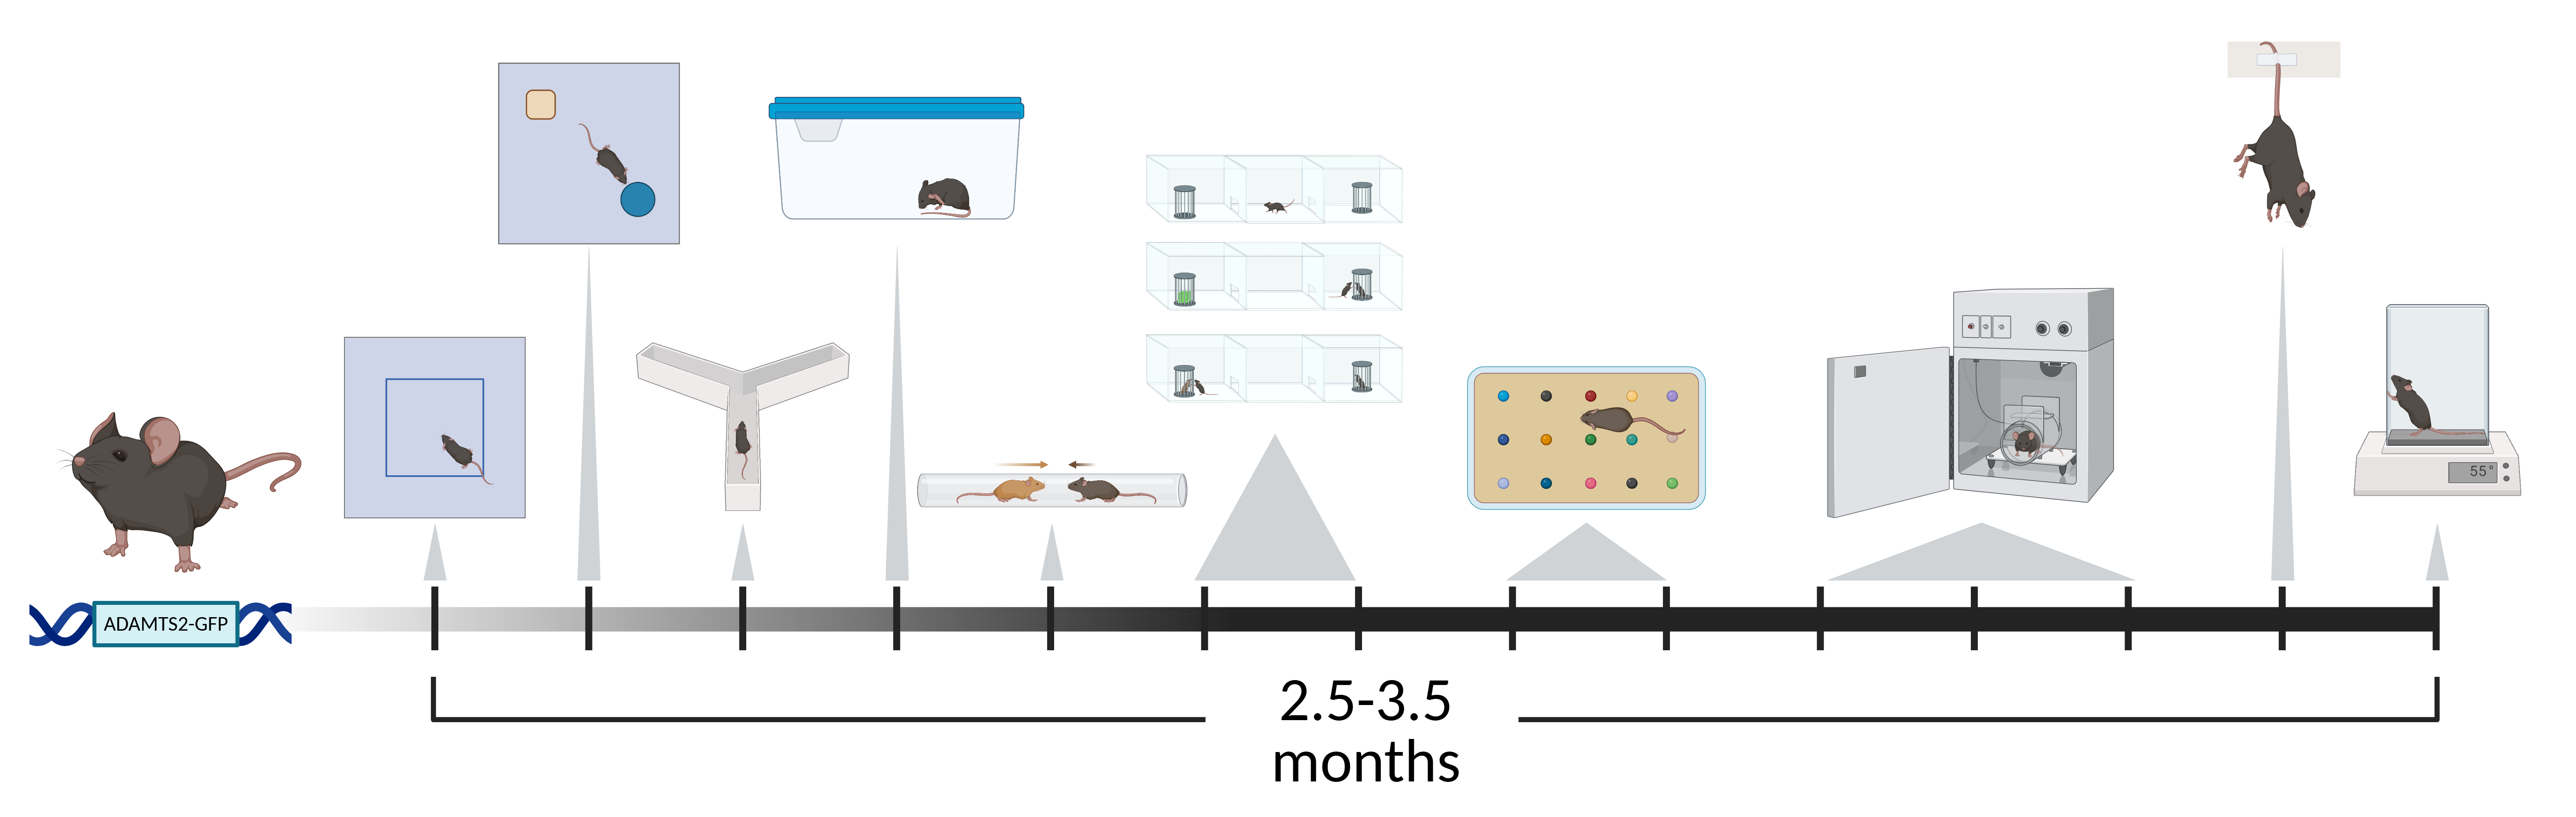
Figure S1.** Execution order of behavioral tests from the least to most stressful: open field, novel object recognition, Y-maze, self-grooming, tube test, three-chamber, marble burying, startle reflex and prepulse inhibition, tail suspension and hotplate. Created with Biorender.com.

**Open field test**

The open field test was conducted to evaluate locomotor activity and anxiety-like behavior. Mice were individually placed in a 45 × 45 cm arena for 15 minutes, and their movements were recorded and analyzed using Viewer software (Biobserve). The arena was divided into two distinct areas: a central zone (25 × 25 cm) and a peripheral zone. Parameters measured included total distance traveled and mean velocity, providing insights into general locomotion and anxiety-related behavior.

**Self-grooming test**

The self-grooming test was conducted to evaluate stereotyped behavior. Mice were placed in a clean, bedding-free home cage for a 10-minute habituation period, followed by a 10-minute recording session. During this period, both the total duration of grooming and the number of grooming episodes were quantified, providing measures of repetitive behavior.

**Startle reflex and prepulse inhibition (PPI)**

The StartFear Combined system (LE0823G, Panlab Harvard Apparatus) was used to assess the startle response and prepulse inhibition (PPI), following a previously described protocol with minor modifications (1). Data acquisition and analysis were performed using Packwin software (Panlab Harvard Apparatus). Mice were placed in a restraint device and exposed to a constant background white noise of 70 dB. The session began with a 10-minute acclimatization period, followed by five pulse-alone trials (120 dB) to establish a baseline startle response. Subsequently, mice underwent a pseudorandomized block of 50 trials, consisting of no-stimulus trials, pulse-alone trials (120 dB), and three prepulse-pulse combinations (74, 80, or 86 dB prepulse followed by a 120 dB pulse), with inter-trial intervals of 10, 15, or 20 seconds. In the final phase, animals were exposed to 25 pulses of varying intensities (0, 90, 100, 110, and 120 dB). Pulse stimuli had a duration of 40 ms, while prepulses lasted 20 ms. The percentage of PPI (%PPI) for each prepulse-pulse condition was calculated using the formula: [(mean SR to pulse-alone - mean SR to prepulse-pulse combination) / mean SR to pulse-alone] × 100.

**Marble burying test**

The marble burying test was conducted to assess repetitive behavior and anxiety. The mouse was placed in a cage with 4 cm of bedding and 20 marbles arranged in 5 rows of 4 marbles each. The mouse's behavior was recorded from a top-down perspective, and the experimenter quantified the time spent digging over a 30-minute period. At the end of the test, the number of marbles buried was recorded. A marble was considered buried if two-thirds of its surface was covered by bedding (2).

**Hotplate test**

The hotplate test (LE7406, Panlab Harvard Apparatus) was performed to evaluate heat sensitivity. Mice were placed on a heated surface maintained at 55 ºC, and the latency to exhibit a nocifensive response, such as jumping or paw licking, was recorded and analyzed.

**Three-chamber test**

The three-chamber test was conducted to assess social preference and social novelty, following previously established protocols with minor modifications (Silverman et al., 2010). The testing apparatus (LE894T, Panlab Harvard Apparatus) consisted of three interconnected compartments, each measuring 42 × 20 cm, with a total chamber size of 42 × 60 cm. The test comprised three consecutive 10-minute phases. During the initial exploration phase, mice were allowed to freely explore the arena. In the social preference phase, an unfamiliar mouse and a novel object were placed in separate cages within the side compartments. In the social novelty phase, the previously encountered familiar mouse remained in its cage, while a new, unfamiliar mouse was introduced in the opposite compartment. Interaction time with the object, the familiar mouse, and the novel mouse was quantified. The social and memory indices were calculated as follows: [(interaction time with the mouse or novel mouse - interaction time with the object or familiar mouse) / (interaction time with the mouse or novel mouse + interaction time with the object or familiar mouse)].

**Tube test**

The tube test was performed to assess dominance behavior. Pairs of same-sex mice from different genotypes were placed at opposite ends of a Plexiglas tube (2.6 cm in diameter) and allowed to interact for up to 2 minutes. The trial concluded when one of the mice retreated from the tube, with the remaining animal designated as the dominant individual. Each mouse underwent two trials against different opponents of the opposite genotype.

**Tail suspension test**

The tail suspension test was used to assess apathy and depressive behavior (3). The mouse was suspended by the tail for a duration of 6 minutes, and the time spent actively moving was manually quantified. Any voluntary movement of the mouse was considered as activity.

**Novel object recognition test**

Mice were introduced into an open field arena containing two identical objects and allowed to explore for 10 minutes. Following a 3-hour retention interval, one of the objects was substituted with a novel object, and mice were given an additional 10 minutes to explore. The time spent interacting with both the familiar and novel objects was recorded. The memory index was computed using the formula: [(interaction time with novel object - interaction time with familiar object) / (interaction time with novel object + interaction time with familiar object)].

**Y-maze test**

Mice were permitted to explore a Y-maze, with each arm measuring 6 x 30 cm, for a duration of 5 minutes while their movements were recorded. Spontaneous alternation behavior was subsequently analyzed using SMART software (Panlab Harvard Apparatus).

**Table S2. List of antibodies used in Western blot and immunofluorescence experiments**

| **Target protein** | **Host species** | **Dilution** | **Product code** | **Manufacturer** |
| --- | --- | --- | --- | --- |
| ADAMTS2 (WB) | Rabbit | 1:1000 | PA5-78728 | Invitrogen |
| ADAMTS2 (IF) | Rabbit | 1:100 | PA5-78728 | Invitrogen |
| GFP (WB) | Mouse | 1:500 | 11814460001 | Roche |
| GFP (IF) | Chicken | 1:250 | A10262 | Invitrogen |
| Reelin (WB) | Mouse | 1:1000 | MAB5364 | Sigma-Aldrich |
| Reelin (IF) | Mouse | 1:500 | MAB5364 | Sigma-Aldrich |
| Dab1 | Rabbit | 1:500 | #3328 | Cell Signaling |
| PSD95 | Mouse | 1:1000 | MA1-046 | Thermo Fisher Scientific |
| β-Actin | Mouse | 1:1000 | A5316 | Sigma-Aldrich |
| Secondary anti-mouse HRP | Goat | 1:5000 | NA931 | Amersham |
| Secondary anti-rabbit HRP | Donkey | 1:5000 | NA934 | Amersham |
| Secondary anti-mouse 647 (IF) | Goat | 1:800 | A32728 | Invitrogen |
| Secondary anti-chicken 488 (IF) | Goat | 1:800 | A-11039 | Thermo Fisher Scientific |
| Secondary anti-rabbit 594 (IF) | Donkey | 1:500 | A-21207 | Life Technologies |

**Body weight is not altered in ADAMTS2-Cre mice compared to controls**

**
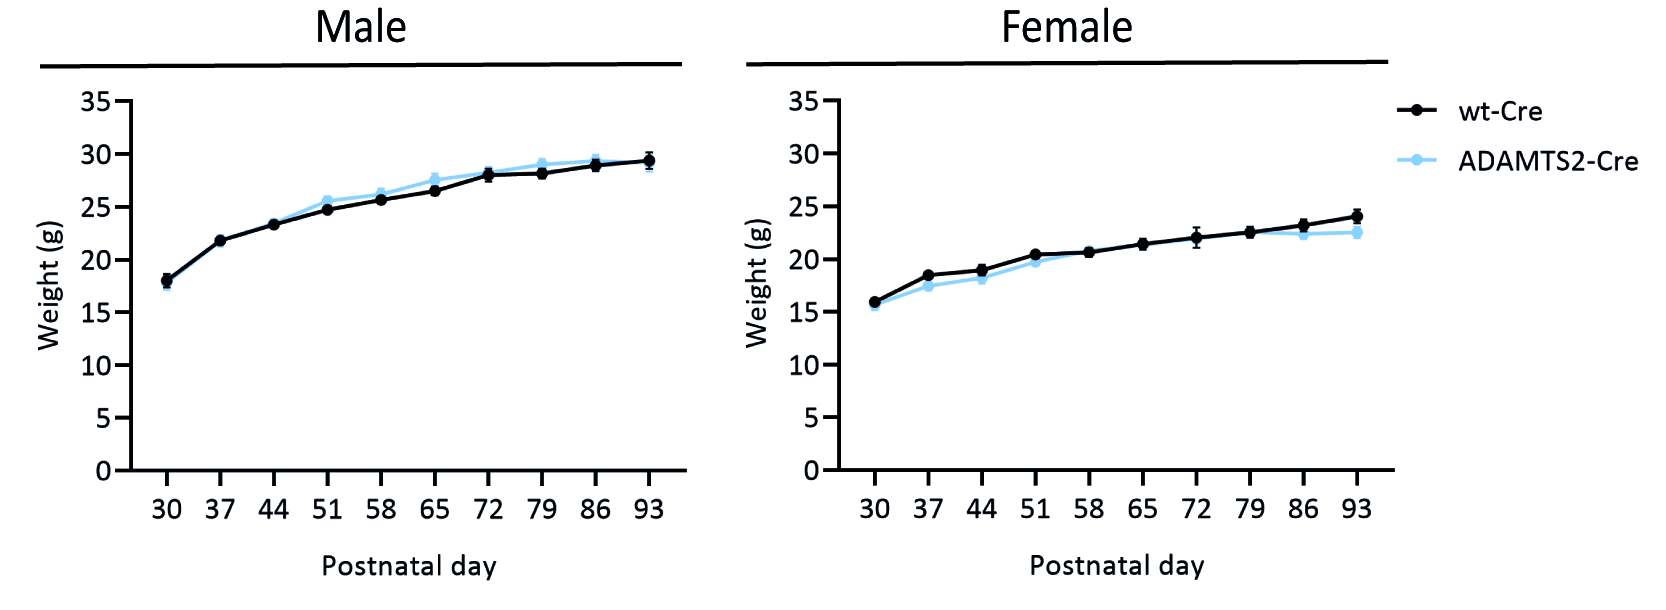
**

**Figure S2.** Body weight is not altered in ADAMTS2-Cre mice (n = 26-36 per genotype and sex).

**Total distance traveled in the open field test**

**
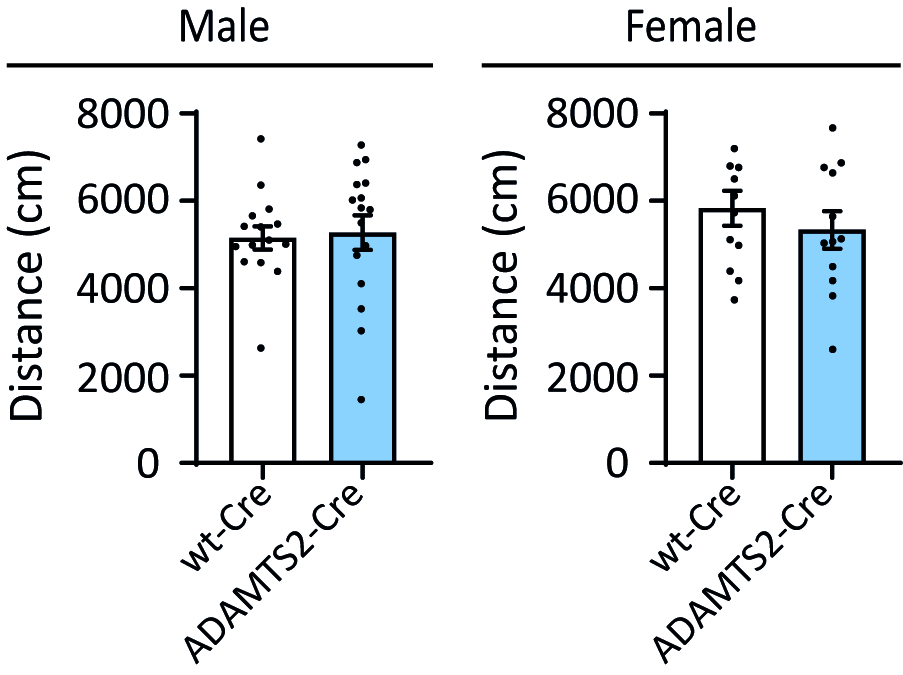
**

**Figure S3.** Total distance traveled is not altered in ADAMTS2-Cre mice in the open field test (n = 12-16 per genotype and sex).

**Percentage of alternations in the Y-maze test**

**
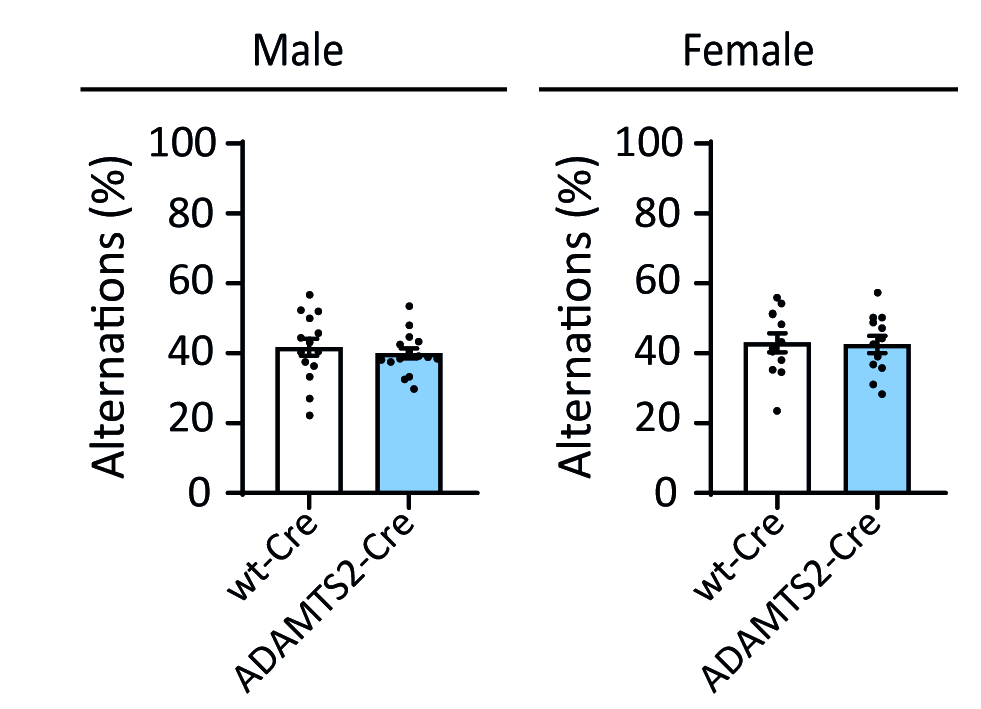
**

**Figure S4.** Percentage of alternations is not altered in ADAMTS2-Cre mice in the Y-maze test (n = 12-16 per genotype and sex).

**Reelin-positive cell density in ADAMTS2-Cre mice**

**
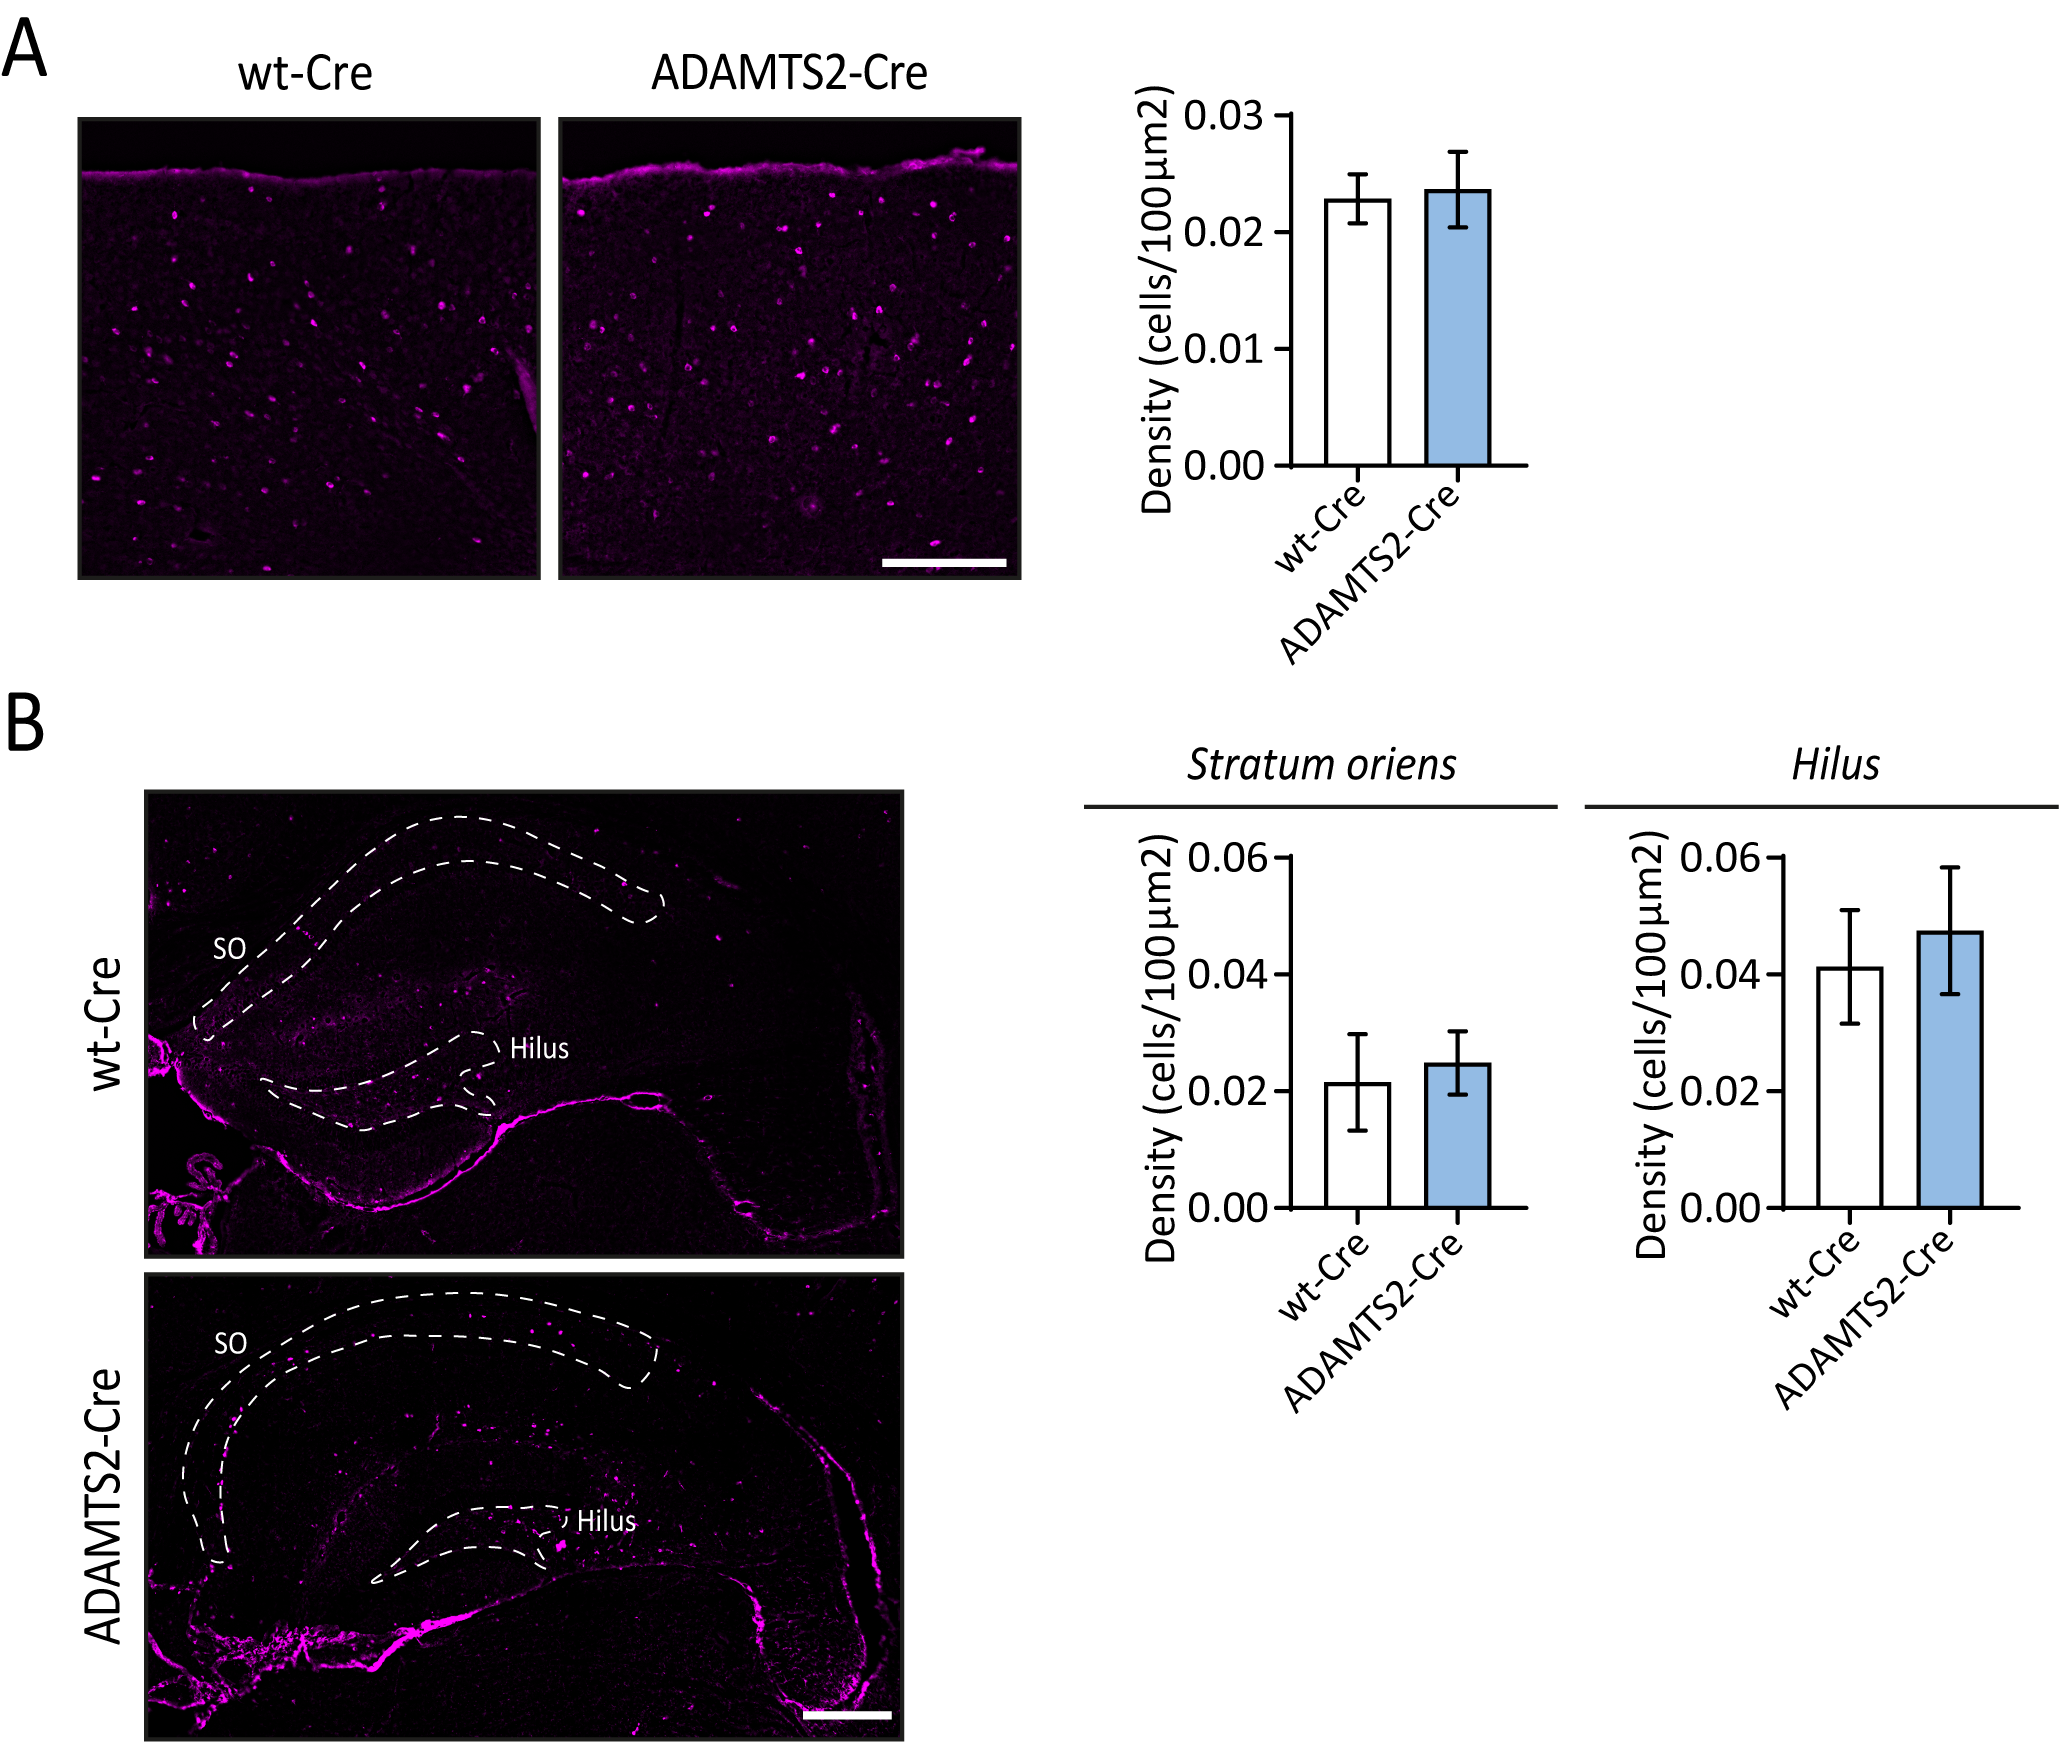
**

**Figure S5.** **Reelin-positive cell density is comparable between ADAMTS2-Cre mice and control littermates. A,** Representative immunofluorescence images of the prefrontal cortex and quantification of Reelin-positive cell density. **B,** Representative images of the stratum, oriens (SO) and hilus within the hippocampal formation, and quantification of Reelin-positive cell density. Quantification was performed across matched coronal sections (n = 6 mice per genotype). Scale: 250µm.

**Total cortical thickness in ADAMTS2-Cre mice**

**
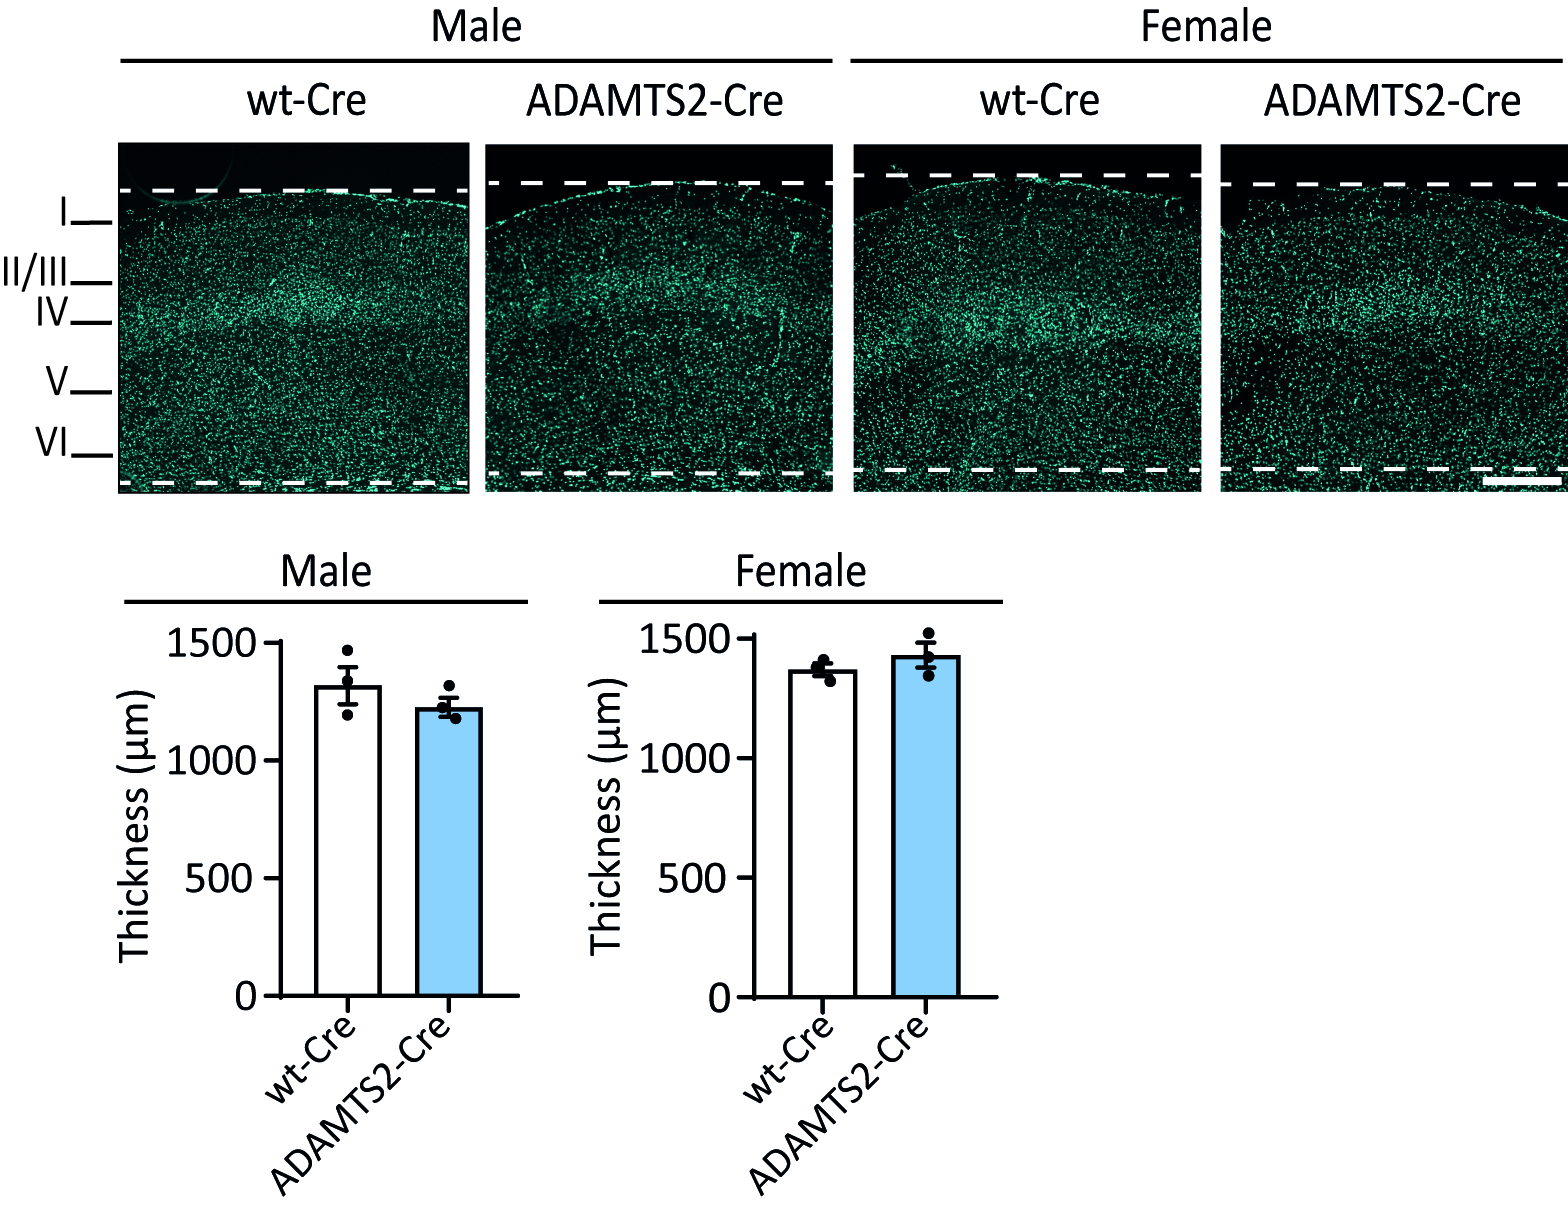
**

**Figure S6.** Total cortical thickness is preserved in ADAMTS2-Cre mice. Representative DAPI-stained coronal sections illustrating cortical layer organization were used for quantification. Measurements of total cortical thickness were performed on matched levels (n = 3 mice per genotype and sex). Scale bar: 250 µm.

**Dendritic spine density in PFC and HP in ADAMTS2-Cre mice**

**
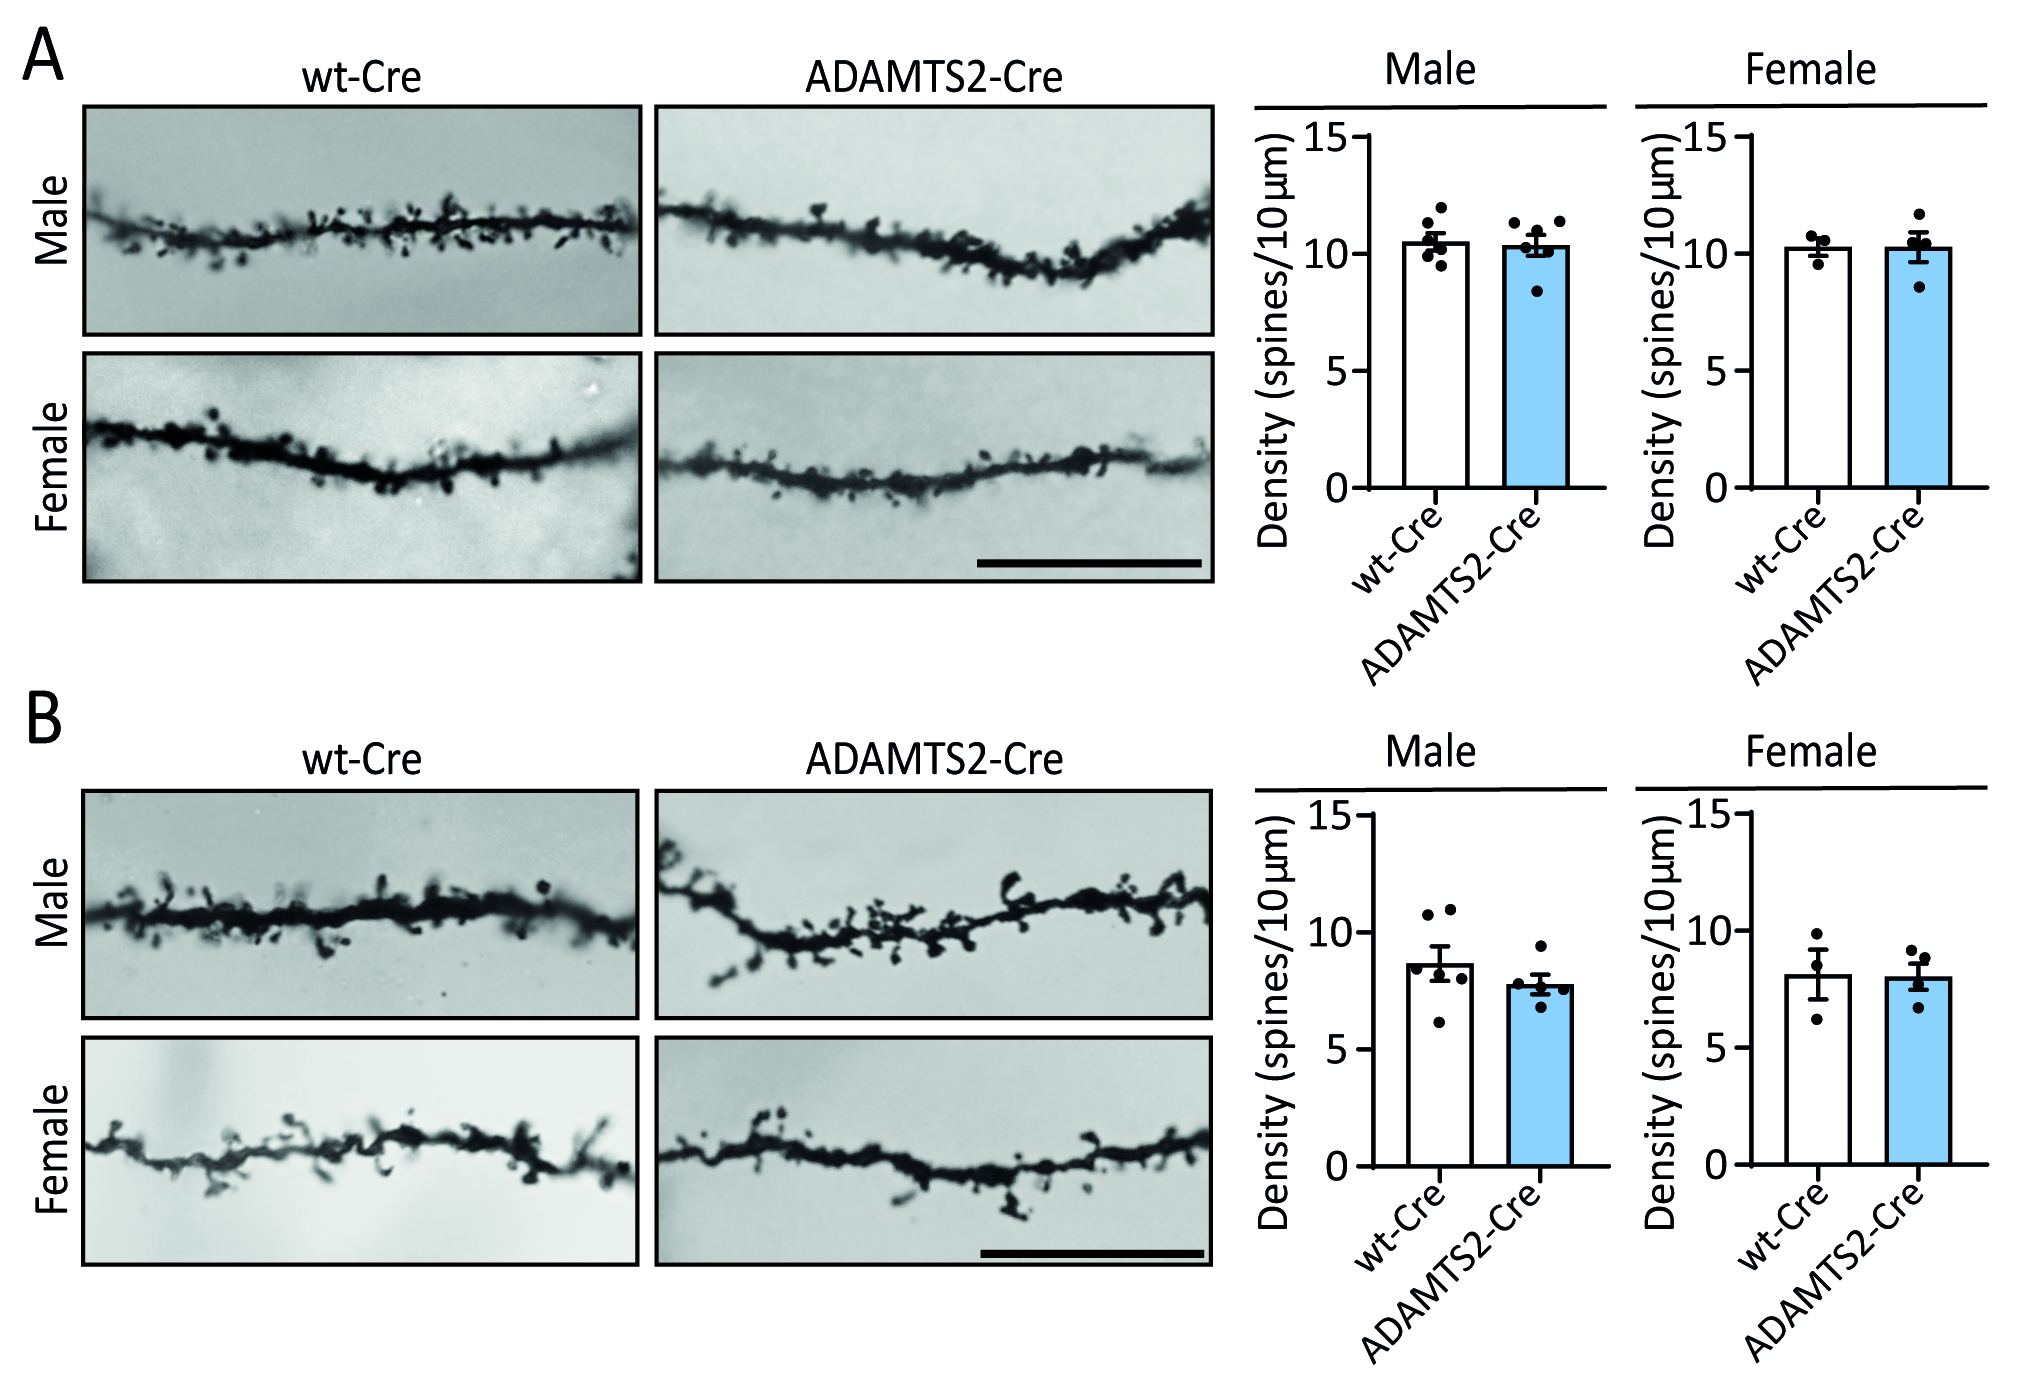
**

**Figure S7.** Dendritic spine density is preserved in ADAMTS2-Cre mice. (A) Representative Golgi–Cox–impregnated dendritic segments from CA1 pyramidal neurons in the hippocampus. (B) Representative dendritic segments from pyramidal neurons in the prefrontal cortex. Spine density was quantified along secondary dendritic branches from well-impregnated neurons at matched levels (n = 4–6 mice per genotype and sex). Scale bar: 10 µm.

**References**

1. García-Partida JA, Torres-Sanchez S, MacDowell K, Fernández-Ponce MT, Casas L, Mantell C, et al. The effects of mango leaf extract during adolescence and adulthood in a rat model of schizophrenia. Front Pharmacol. 2022 Jul 26;13:886514.

2. Simmons DH, Titley HK, Hansel C, Mason P. Behavioral Tests for Mouse Models of Autism: An Argument for the Inclusion of Cerebellum-Controlled Motor Behaviors. Neuroscience. 2021 May;462:303–19.

3. Can A, Dao DT, Terrillion CE, Piantadosi SC, Bhat S, Gould TD. The Tail Suspension Test. JoVE. 2011 Dec 13;(58):3769.
